# Supplementary material for: Correlation of safety and efficacy of atezolizumab therapy across indications
Source: PubMed Central journal article supplement — J Immunother Cancer. 2024 Nov 12;12(11):e010158. doi: 10.1136/jitc-2024-010158 (PMC11575237; doi:10.1136/jitc-2024-010158), 2024-11-12
Supplement: jitc-12-11-s001.pdf [file jitc-12-11-s001.pdf]

## Supplemental information (Tables and Figures)

**Table S1**

Studies, indications, therapy arm description and number of eligible patients (N)

| STUDYID | Study Name   | Indication                    | Atezo arm (mono or combo therapy)                                          | Ctrl Arm (Chemotherapy combo)                        | Line       | N (SAFFL) |
|---------|--------------|-------------------------------|----------------------------------------------------------------------------|------------------------------------------------------|------------|-----------|
| GO28625 | FIR          | NSCLC                         | Atezo                                                                      | none                                                 | 1L, 2L     | 137       |
| GO28754 | BIRCH        | NSCLC                         | Atezo                                                                      | none                                                 | 1L, 2L, 3L | 659       |
| GO28915 | OAK          | NSCLC                         | Atezo                                                                      | Docetaxel                                            | 2L         | 1187      |
| GO29431 | IMpower110   | NSCLC                         | Atezo                                                                      | (Carboplatin/ Cisplatin) + (Pemetrexed/ Gemcitabine) | 1L         | 549       |
| GO29436 | IMpower150   | NSCLC                         | Atezo+Carboplatin+Placlitaxel   Atezo+Carboplatin+Placlitaxel+ Bevacizumab | Carboplatin+Placlitaxel+ Bevacizumab                 | 1L         | 1187      |
| GO29437 | IMpower131   | NSCLC                         | Atezo+Carboplatin+Placlitaxel   Atezo+Carboplatin+nab Paclitaxel           | Carboplatin+nab-Paclitaxel                           | 1L         | 1000      |
| GO30081 | IMpower133   | SCLC                          | Atezo+Carboplatin+Etoposide                                                | Placebo+Carboplatin+Etoposide                        | 1L         | 494       |
| GO29537 | IMpower130   | NSCLC                         | Atezo+Carboplatin+Placlitaxel                                              | Carboplatin+nab-Paclitaxel                           | 1L         | 705       |
| GO29438 | IMpower132   | NSCLC                         | Atezo+Carbo/Cisplatin+Pemetrexed                                           | Carbo/Cisplatin+Pemetrexed                           | 1L         | 727       |
| WO29074 | IMmotion150  | Advanced Renal Cell Carcinoma | Atezo   Atezo and Bevacizumab                                              | -                                                    | 1L         | 204       |
| WO29637 | IMmotion151  | Advanced Renal Cell Carcinoma | Atezo and Bevacizumab                                                      | -                                                    | 1L         | 451       |
| WO29522 | IMpassion130 | TNBC                          | Atezo                                                                      | Placebo + Nab Paclitaxel                             | 1L         | 890       |
| GO29293 | IMvigor210   | Urothelial Bladder Cancer     | Atezo                                                                      | -                                                    | 1L         | 429       |
| GO29294 | IMvigor211   | Urothelial Bladder Cancer     | Atezo                                                                      | Vinflunine   Paclitaxel   Docetaxel                  | 1L-2L      | 902       |

irAEs = immune-related adverse events were reported in all study arms, including Standard of Care without atezolizumab, given the blinded nature of the controlled trials.

**Table S2 Incidence proportion and incidence rate of irAEs by indication**

**a) NSCLC/SCLC**

| Indication        | irAE                             | IO   C-IO    |                       | Chemotherapy |                       |
|-------------------|----------------------------------|--------------|-----------------------|--------------|-----------------------|
|                   |                                  | nr irAE (%)  | irAE per 100 pt-years | nr irAE (%)  | irAE per 100 pt-years |
| NSCLC/SCLC        | any irAE                         | 1820 (42.9%) | 85.71                 | 602 (25%)    | 66.4                  |
|                   | Skin                             | 974 (23%)    | 35.63                 | 341 (14.2%)  | 33.48                 |
|                   | Hepatitis                        | 604 (14.2%)  | 18.66                 | 213 (8.9%)   | 19.13                 |
|                   | Thyroid                          | 471 (11.1%)  | 14.53                 | 74 (3.1%)    | 6.35                  |
|                   | Pneumonitis                      | 210 (5%)     | 5.89                  | 31 (1.3%)    | 2.6                   |
|                   | Colitis                          | 58 (1.4%)    | 1.59                  | 6 (0.2%)     | 0.5                   |
|                   | Adrenal Insufficiency            | 33 (0.8%)    | 0.9                   | 5 (0.2%)     | 0.42                  |
|                   | Pancreatitis                     | 30 (0.7%)    | 0.82                  | 6 (0.2%)     | 0.5                   |
|                   | Diabetes Mellitus                | 23 (0.5%)    | 0.63                  | 8 (0.3%)     | 0.67                  |
|                   | Myositis Myositis+Rhabdomyolysis | 18 (0.4%)    | 0.49                  | 3 (0.1%)     | 0.25                  |
|                   | Meningoencephalitis              | 21 (0.5%)    | 0.57                  | 2 (0.1%)     | 0.17                  |
|                   | Meningitis                       | 15 (0.4%)    | 0.41                  | 2 (0.1%)     | 0.17                  |
|                   | Nephritis                        | 13 (0.3%)    | 0.35                  | 3 (0.1%)     | 0.25                  |
|                   | Ocular Inflammatory Toxicity     | 14 (0.3%)    | 0.38                  | 1 (0%)       | 0.08                  |
|                   | Vasculitis                       | 12 (0.3%)    | 0.33                  | 2 (0.1%)     | 0.17                  |
|                   | Hypophysitis                     | 7 (0.2%)     | 0.19                  | 0 (0%)       | 0                     |
|                   | Systemic Immune Activation       | 2 (0%)       | 0.05                  | 0 (0%)       | 0                     |
|                   | Autoimmune Hemolytic Anemia      | 7 (0.2%)     | 0.19                  | 1 (0%)       | 0.08                  |
|                   | Guillain-Barre Syndrome          | 6 (0.1%)     | 0.16                  | 0 (0%)       | 0                     |
|                   | Encephalitis                     | 6 (0.1%)     | 0.16                  | 0 (0%)       | 0                     |
|                   | Myocarditis                      | 2 (0%)       | 0.05                  | 1 (0%)       | 0.08                  |
| Myasthenia Gravis | 0 (0%)                           | 0            | 1 (0%)                | 0.08         |                       |

irAEs = immune-related adverse events were reported in all study arms, including Standard of Care without atezolizumab, given the blinded nature of the controlled trials.

## b) Advanced Renal Cell Carcinoma

| Indication                    | irAE                             | IO   C-IO   |                       | Chemotherapy |                       |
|-------------------------------|----------------------------------|-------------|-----------------------|--------------|-----------------------|
|                               |                                  | nr irAE (%) | irAE per 100 pt-years | nr irAE (%)  | irAE per 100 pt-years |
| Advanced Renal Cell Carcinoma | any irAE                         | 400 (61.1%) | 92.56                 | -            | -                     |
|                               | Skin                             | 233 (35.6%) | 35.73                 | -            | -                     |
|                               | Hepatitis                        | 84 (12.8%)  | 9.76                  | -            | -                     |
|                               | Thyroid                          | 176 (26.9%) | 24.93                 | -            | -                     |
|                               | Pneumonitis                      | 14 (2.1%)   | 1.47                  | -            | -                     |
|                               | Colitis                          | 16 (2.4%)   | 1.7                   | -            | -                     |
|                               | Adrenal Insufficiency            | 14 (2.1%)   | 1.47                  | -            | -                     |
|                               | Pancreatitis                     | 17 (2.6%)   | 1.8                   | -            | -                     |
|                               | Diabetes Mellitus                | 9 (1.4%)    | 0.95                  | -            | -                     |
|                               | Myositis Myositis+Rhabdomyolysis | 4 (0.6%)    | 0.42                  | -            | -                     |
|                               | Meningoencephalitis              | 4 (0.6%)    | 0.42                  | -            | -                     |
|                               | Meningitis                       | 4 (0.6%)    | 0.42                  | -            | -                     |
|                               | Nephritis                        | 6 (0.9%)    | 0.63                  | -            | -                     |
|                               | Ocular Inflammatory Toxicity     | 2 (0.3%)    | 0.21                  | -            | -                     |
|                               | Vasculitis                       | 3 (0.5%)    | 0.31                  | -            | -                     |
|                               | Hypophysitis                     | 5 (0.8%)    | 0.52                  | -            | -                     |
|                               | Systemic Immune Activation       | 4 (0.6%)    | 0.42                  | -            | -                     |
|                               | Autoimmune Hemolytic Anemia      | 0 (0%)      | 0                     | -            | -                     |
|                               | Guillain-Barre Syndrome          | 0 (0%)      | 0                     | -            | -                     |
|                               | Encephalitis                     | 0 (0%)      | 0                     | -            | -                     |
|                               | Myocarditis                      | 2 (0.3%)    | 0.21                  | -            | -                     |
| Myasthenia Gravis             | 0 (0%)                           | 0           | -                     | -            |                       |

irAEs = immune-related adverse events were reported in all study arms, including Standard of Care without atezolizumab, given the blinded nature of the controlled trials.

### c) Urothelial Bladder Cancer

| Indication                | irAE                             | IO   C-IO   |                       | Chemotherapy |                       |
|---------------------------|----------------------------------|-------------|-----------------------|--------------|-----------------------|
|                           |                                  | nr irAE (%) | irAE per 100 pt-years | nr irAE (%)  | irAE per 100 pt-years |
| Urothelial Bladder Cancer | any irAE                         | 288 (32.4%) | 78.45                 | 74 (16.7%)   | 54.2                  |
|                           | Skin                             | 176 (19.8%) | 40.33                 | 49 (11.1%)   | 34.77                 |
|                           | Hepatitis                        | 93 (10.5%)  | 17.64                 | 26 (5.9%)    | 17.14                 |
|                           | Thyroid                          | 50 (5.6%)   | 9.18                  | 0 (0%)       | 0                     |
|                           | Pneumonitis                      | 19 (2.1%)   | 3.37                  | 3 (0.7%)     | 1.92                  |
|                           | Colitis                          | 14 (1.6%)   | 2.43                  | 1 (0.2%)     | 0.64                  |
|                           | Adrenal Insufficiency            | 4 (0.5%)    | 0.69                  | 1 (0.2%)     | 0.64                  |
|                           | Pancreatitis                     | 4 (0.5%)    | 0.69                  | 0 (0%)       | 0                     |
|                           | Diabetes Mellitus                | 2 (0.2%)    | 0.34                  | 0 (0%)       | 0                     |
|                           | Myositis Myositis+Rhabdomyolysis | 8 (0.9%)    | 1.39                  | 0 (0%)       | 0                     |
|                           | Meningoencephalitis              | 0 (0%)      | 0                     | 1 (0.2%)     | 0.64                  |
|                           | Meningitis                       | 0 (0%)      | 0                     | 1 (0.2%)     | 0.64                  |
|                           | Nephritis                        | 1 (0.1%)    | 0.17                  | 0 (0%)       | 0                     |
|                           | Ocular Inflammatory Toxicity     | 3 (0.3%)    | 0.52                  | 0 (0%)       | 0                     |
|                           | Vasculitis                       | 2 (0.2%)    | 0.34                  | 0 (0%)       | 0                     |
|                           | Hypophysitis                     | 0 (0%)      | 0                     | 0 (0%)       | 0                     |
|                           | Systemic Immune Activation       | 1 (0.1%)    | 0.17                  | 0 (0%)       | 0                     |
|                           | Autoimmune Hemolytic Anemia      | 0 (0%)      | 0                     | 0 (0%)       | 0                     |
|                           | Guillain-Barre Syndrome          | 0 (0%)      | 0                     | 0 (0%)       | 0                     |
|                           | Encephalitis                     | 0 (0%)      | 0                     | 0 (0%)       | 0                     |
|                           | Myocarditis                      | 0 (0%)      | 0                     | 0 (0%)       | 0                     |
|                           | Myasthenia Gravis                | 0 (0%)      | 0                     | 0 (0%)       | 0                     |

irAEs = immune-related adverse events were reported in all study arms, including Standard of Care without atezolizumab, given the blinded nature of the controlled trials.

**d) Triple negative breast cancer**

| Indication | irAE                             | IO   C-IO   |                       | Chemotherapy |                       |
|------------|----------------------------------|-------------|-----------------------|--------------|-----------------------|
|            |                                  | nr irAE (%) | irAE per 100 pt-years | nr irAE (%)  | irAE per 100 pt-years |
| TNBC       | any irAE                         | 199 (44.7%) | 102.7                 | 147 (33%)    | 78.13                 |
|            | Skin                             | 93 (20.9%)  | 39.42                 | 85 (19.1%)   | 39.59                 |
|            | Hepatitis                        | 58 (13%)    | 21.8                  | 57 (12.8%)   | 23.7                  |
|            | Thyroid                          | 70 (15.7%)  | 27                    | 17 (3.8%)    | 6.75                  |
|            | Pneumonitis                      | 13 (2.9%)   | 4.52                  | 2 (0.4%)     | 0.76                  |
|            | Colitis                          | 5 (1.1%)    | 1.71                  | 2 (0.4%)     | 0.77                  |
|            | Adrenal Insufficiency            | 2 (0.4%)    | 0.69                  | 0 (0%)       | 0                     |
|            | Pancreatitis                     | 1 (0.2%)    | 0.34                  | 0 (0%)       | 0                     |
|            | Diabetes Mellitus                | 1 (0.2%)    | 0.34                  | 3 (0.7%)     | 1.14                  |
|            | Myositis Myositis+Rhabdomyolysis | 0 (0%)      | 0                     | 1 (0.2%)     | 0.38                  |
|            | Meningoencephalitis              | 4 (0.9%)    | 1.38                  | 1 (0.2%)     | 0.38                  |
|            | Meningitis                       | 4 (0.9%)    | 1.38                  | 1 (0.2%)     | 0.38                  |
|            | Nephritis                        | 0 (0%)      | 0                     | 0 (0%)       | 0                     |
|            | Ocular Inflammatory Toxicity     | 1 (0.2%)    | 0.34                  | 0 (0%)       | 0                     |
|            | Vasculitis                       | 0 (0%)      | 0                     | 1 (0.2%)     | 0.38                  |
|            | Hypophysitis                     | 0 (0%)      | 0                     | 0 (0%)       | 0                     |
|            | Systemic Immune Activation       | 1 (0.2%)    | 0.34                  | 0 (0%)       | 0                     |
|            | Autoimmune Hemolytic Anemia      | 0 (0%)      | 0                     | 0 (0%)       | 0                     |
|            | Guillain-Barre Syndrome          | 0 (0%)      | 0                     | 0 (0%)       | 0                     |
|            | Encephalitis                     | 0 (0%)      | 0                     | 0 (0%)       | 0                     |
|            | Myocarditis                      | 0 (0%)      | 0                     | 0 (0%)       | 0                     |
|            | Myasthenia Gravis                | 0 (0%)      | 0                     | 0 (0%)       | 0                     |

irAEs = immune-related adverse events were reported in all study arms, including Standard of Care without atezolizumab, given the blinded nature of the controlled trials.

**Table S3 List of baseline covariates adjusted in the statistical models**

| <b>Variable</b>                            | <b>Status</b> | <b>Analysis</b>      | <b>Comment</b>         |
|--------------------------------------------|---------------|----------------------|------------------------|
| Age                                        | log and scale | Final                | used in all irAEs      |
| Sex                                        | Categorical   | Final                | used in all irAEs      |
| Asian                                      | Categorical   | Final                | used in all irAEs      |
| Caucasian                                  | Categorical   | Final                | used in all irAEs      |
| Tumor histology                            | Categorical   | Final                | used in all irAEs      |
| Time from initial diagnosis                | log and scale | Final                | used in all irAEs      |
| Sum of Longest Diameter by Investigator    | log and scale | Final                | used in all irAEs      |
| Patient with liver metastasis at screening | Categorical   | Final                | used in all irAEs      |
| Alkaline Phosphatase (U/L)                 | log and scale | Final                | used in all irAEs      |
| SGPT/ALT (U/L)                             | log and scale | Final                | used in all irAEs      |
| SGOT/AST (U/L)                             | log and scale | Final                | used in all irAEs      |
| Chloride (mmol/L)                          | log and scale | Final                | used in all irAEs      |
| Glucose (mmol/L)                           | log and scale | Final                | used in all irAEs      |
| Potassium (mmol/L)                         | log and scale | Final                | used in all irAEs      |
| Erythrocytes (10 <sup>12</sup> /L)         | log and scale | Final                | used in all irAEs      |
| Sodium (mmol/L)                            | log and scale | Final                | used in all irAEs      |
| Bilirubin (umol/L)                         | log and scale | Final                | used in all irAEs      |
| Protein, Total (g/L)                       | log and scale | Final                | used in all irAEs      |
| Lactate Dehydrogenase (U/L)                | log and scale | Sensitivity analysis | High amount of missing |
| Thyroid-Stimulating Hormone (mU/L)         | log and scale | Final                | used in Thyroid only   |
| Weight (kg)                                | log and scale | Sensitivity analysis | High amount of missing |
| Baseline ECOG Performance Status           | Categorical   | Sensitivity analysis | High amount of missing |

**Table S4 Individual-patient level meta-analysis Hazard Ratio estimates, confidence intervals, p-values for the association of onset of irAE with Overall Survival in patients treated with atezolizumab (alone or in combination) and with chemotherapy.**

| irAE        | Study arm       | Tox Grade | HR   | Lower* | Upper* | p-value | FDR p-value |
|-------------|-----------------|-----------|------|--------|--------|---------|-------------|
| Any irAE    | TRT: IO or C-IO | G1-2      | 0.65 | 0.59   | 0.71   | 0.0000  | 0.0000      |
|             | TRT: IO or C-IO | G3-4      | 1.18 | 0.96   | 1.45   | 0.0616  | 0.1026      |
|             | TRT: C          | G1-2      | 0.81 | 0.71   | 0.91   | 0.0000  | 0.0001      |
|             | TRT: C          | G3-4      | 1.27 | 0.88   | 1.83   | 0.1592  | 0.2653      |
| Skin        | TRT: IO or C-IO | G1-2      | 0.63 | 0.56   | 0.71   | 0.0000  | 0.0000      |
|             | TRT: IO or C-IO | G3-4      | 0.78 | 0.51   | 1.19   | 0.2076  | 0.2596      |
|             | TRT: C          | G1-2      | 0.74 | 0.64   | 0.87   | 0.0000  | 0.0000      |
|             | TRT: C          | G3-4      | 0.42 | 0.14   | 1.25   | 0.0521  | 0.2183      |
| Hepatitis   | TRT: IO or C-IO | G1-2      | 0.94 | 0.83   | 1.06   | 0.2445  | 0.2934      |
|             | TRT: IO or C-IO | G3-4      | 1.11 | 0.89   | 1.4    | 0.3486  | 0.3486      |
|             | TRT: C          | G1-2      | 0.94 | 0.8    | 1.11   | 0.4471  | 0.5365      |
|             | TRT: C          | G3-4      | 1.24 | 0.77   | 1.99   | 0.3825  | 0.3825      |
| Pneumonitis | TRT: IO or C-IO | G1-2      | 0.78 | 0.62   | 0.99   | 0.0208  | 0.0313      |
|             | TRT: IO or C-IO | G3-4      | 1.71 | 1.11   | 2.62   | 0.0005  | 0.0019      |
|             | TRT: C          | G1-2      | 0.78 | 0.42   | 1.47   | 0.4182  | 0.5365      |
|             | TRT: C          | G3-4      | 1.72 | 0.84   | 3.51   | 0.0873  | 0.2183      |
| Thyroid     | TRT: IO or C-IO | G1-2      | 0.65 | 0.56   | 0.76   | 0.0000  | 0.0000      |
|             | TRT: C          | G1-2      | 0.85 | 0.62   | 1.17   | 0.2793  | 0.5365      |
| Colitis     | TRT: IO or C-IO | G1-2      | 0.87 | 0.5    | 1.5    | 0.6191  | 0.6191      |
|             | TRT: IO or C-IO | G3-4      | 2.14 | 1.2    | 3.82   | 0.0008  | 0.0019      |
|             | TRT: C          | G1-2      | 0.69 | 0.17   | 2.83   | 0.5945  | 0.5945      |
|             | TRT: C          | G3-4      | 0.55 | 0.17   | 1.83   | 0.3075  | 0.3825      |

\* Confidence intervals using FDR corrections

irAEs = immune-related adverse events were reported in all study arms, including Standard of Care without atezolizumab, given the blinded nature of the controlled trials.

IO = atezolizumab monotherapy, C-IO = atezolizumab in combination with chemotherapy or bevacizumab, chemotherapy = Chemotherapy regime or chemotherapy with bevacizumab.

Skin = immune-related rash, immune-related severe cutaneous reactions.

Hepatitis = immune-related hepatitis (clinical diagnosis), immune-related hepatitis (lab abnormalities).

Thyroid = immune-related hypothyroidism, immune-related hyperthyroidism, immune-related thyroiditis.

**Figure S1. Patients disposition**

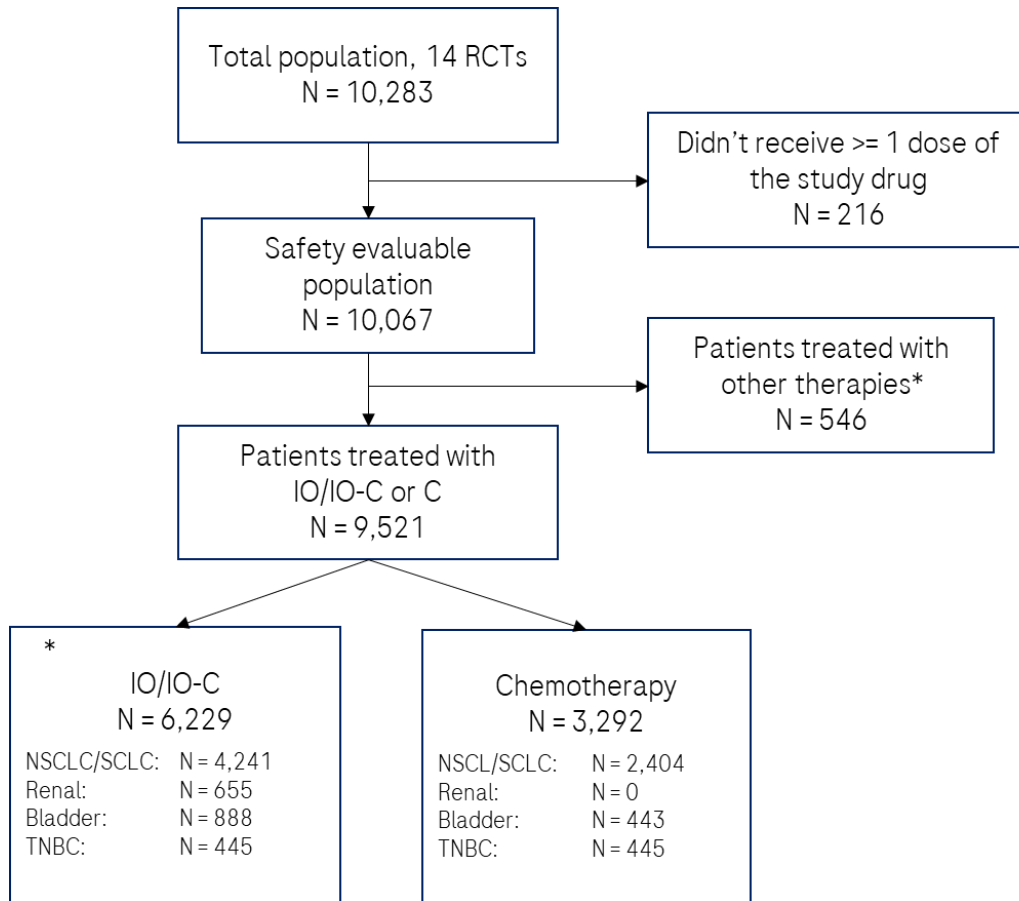

IO = atezolizumab as monotherapy, C-IO = atezolizumab in combination with chemotherapy and/or bevacizumab.

\* Other therapies = Sunitinib (advanced renal cell carcinoma studies) .



**Figure S2. Proportion of irAEs, by toxicity grade and cancer indication**

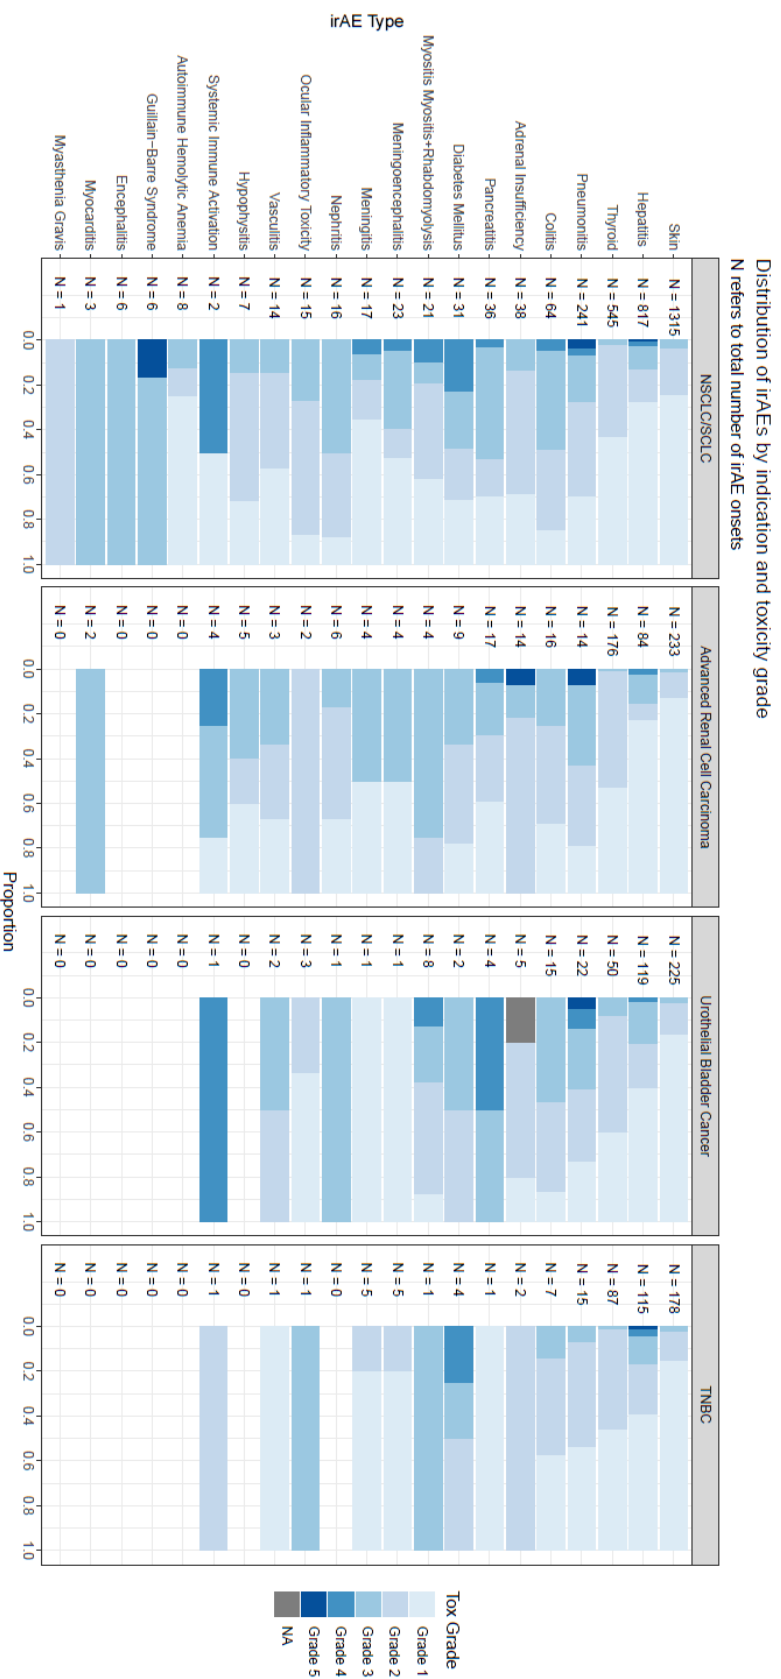

irAEs = immune-related adverse events were reported in all study arms, including Standard of Care without atezolizumab, given the blinded nature of the controlled trials. IO = atezolizumab monotherapy, C+IO = atezolizumab in combination with chemotherapy or bevacizumab, chemotherapy = Chemotherapy regime or chemotherapy with bevacizumab. Skin = immune-related rash, immune-related severe cutaneous reactions. Hepatitis = immune-related hepatitis (clinical diagnosis), immune-related hepatitis (lab abnormalities). Thyroid = immune-related hypothyroidism, immune-related hyperthyroidism, immune-related thyroiditis.

**Figure S3. Incidence rates (incidence densities) of irAE per 100 patients-years at risk**

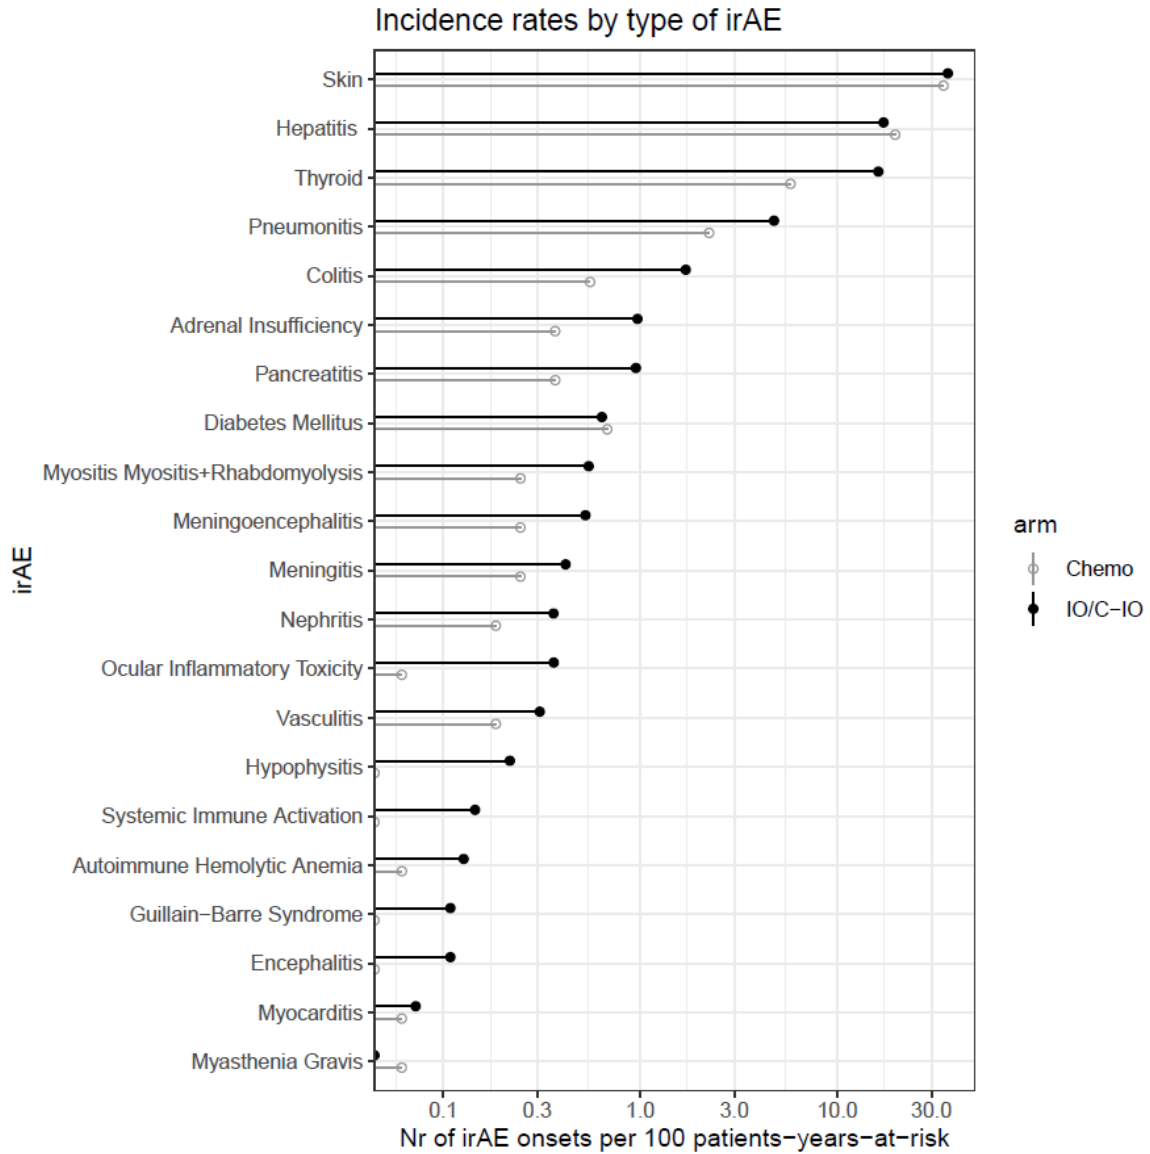

irAEs = immune-related adverse events were reported in all study arms, including Standard of Care without atezolizumab, given the blinded nature of the controlled trials.

**Figure S4**

**Estimation of the hazard function of the top 5 irAEs for patients treated with IO | C IO and C, using: the piecewise exponential hazard function (gray) and kernel-based methods (black)**

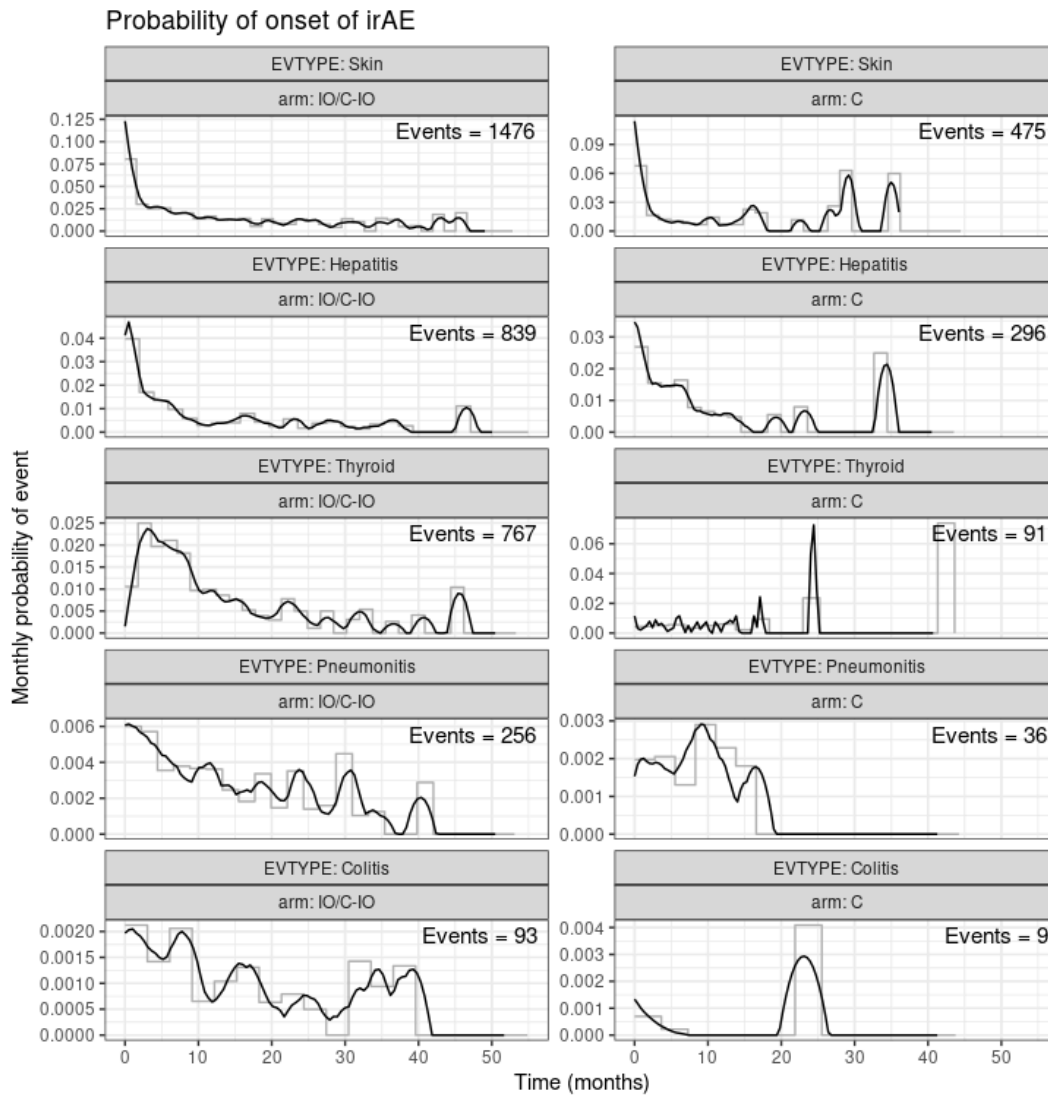

irAEs = immune-related adverse events were reported in all study arms, including Standard of Care without atezolizumab, given the blinded nature of the controlled trials.

IO = atezolizumab monotherapy, C-IO = atezolizumab in combination with chemotherapy or bevacizumab, chemotherapy = Chemotherapy regime or chemotherapy with bevacizumab.

Skin = immune-related rash, immune-related severe cutaneous reactions.

Hepatitis = immune-related hepatitis (clinical diagnosis), immune-related hepatitis (lab abnormalities).

Thyroid = immune-related hypothyroidism, immune-related hyperthyroidism, immune-related thyroiditis.
